# Supplementary material for: Strategies and impacts of patient and family engagement in collaborative mental healthcare: protocol for a systematic and realist review
Source: PubMed Central journal article supplement — BMJ Open. 2016 Sep 27;6(9):e012949. doi: 10.1136/bmjopen-2016-012949 (PMC5051434; doi:10.1136/bmjopen-2016-012949), 2016-09-27
Supplement: bmjopen-2016-012949supp_appendix.pdf [file bmjopen-2016-012949supp_appendix.pdf]

### Supplementary Appendix 1

#### CINAHL search for systematic and realist review on patient and family engagement in collaborative mental health care

| #   | Query                                                                                                                                                                                                                                                                                                                                                                                                                                                                                                                                                                                                                                                                                                                                                                                                                                                                                                                                                                                                                                                                                                                                                                                                                                                                                                                                                                                                                                                                                                                                                                                                                                                                                                                                                                                                                                                                                                                                                                                                                                                                                                                                                                                                                |
|-----|----------------------------------------------------------------------------------------------------------------------------------------------------------------------------------------------------------------------------------------------------------------------------------------------------------------------------------------------------------------------------------------------------------------------------------------------------------------------------------------------------------------------------------------------------------------------------------------------------------------------------------------------------------------------------------------------------------------------------------------------------------------------------------------------------------------------------------------------------------------------------------------------------------------------------------------------------------------------------------------------------------------------------------------------------------------------------------------------------------------------------------------------------------------------------------------------------------------------------------------------------------------------------------------------------------------------------------------------------------------------------------------------------------------------------------------------------------------------------------------------------------------------------------------------------------------------------------------------------------------------------------------------------------------------------------------------------------------------------------------------------------------------------------------------------------------------------------------------------------------------------------------------------------------------------------------------------------------------------------------------------------------------------------------------------------------------------------------------------------------------------------------------------------------------------------------------------------------------|
| S25 | S12 AND S23 AND S24                                                                                                                                                                                                                                                                                                                                                                                                                                                                                                                                                                                                                                                                                                                                                                                                                                                                                                                                                                                                                                                                                                                                                                                                                                                                                                                                                                                                                                                                                                                                                                                                                                                                                                                                                                                                                                                                                                                                                                                                                                                                                                                                                                                                  |
| S24 | MH "Quantitative Studies" OR MH "Clinical Trials+" OR MH "Random Assignment" OR PT "Cinical Trial" OR ( TI trial* or AB trial* ) OR ( TI ((singl* or doubl* or trebl* or tripl*) and (blind* or dummy or mask)) ) OR ( AB ((singl* or doubl* or trebl* or tripl*) and (blind* or dummy or mask)) ) OR ( TI (randomi?ed) or AB (randomi?ed) ) OR ( TI (random* and (allocat* or assign*)) or AB (random* and (allocat* or assign*)) ) OR ( TI (control* trial* or control* stud* or control group*) or AB (control* trial* or control* stud* or control group*)) )                                                                                                                                                                                                                                                                                                                                                                                                                                                                                                                                                                                                                                                                                                                                                                                                                                                                                                                                                                                                                                                                                                                                                                                                                                                                                                                                                                                                                                                                                                                                                                                                                                                    |
| S23 | S13 OR S14 OR S15 OR S16 OR S17 OR S18 OR S19 OR S20 OR S21 OR S22                                                                                                                                                                                                                                                                                                                                                                                                                                                                                                                                                                                                                                                                                                                                                                                                                                                                                                                                                                                                                                                                                                                                                                                                                                                                                                                                                                                                                                                                                                                                                                                                                                                                                                                                                                                                                                                                                                                                                                                                                                                                                                                                                   |
| S22 | ( TI (care manage* or chronic care* or complex intervention* or cooperative behav* or co-operative behav* or joint working or pathway or interprofessional or inter-professional or interdisciplinary or inter-disciplinary or multidisciplin* or multi-disciplin* or multiprofession* or multi-profession* or transdisciplin* or trans-disciplin* or multifacet* or multi-facet* or complex intervention* or multiple intervention* or multi-intervention* or organisational intervention* or organizational intervention* or interpersonal relation* or inter-personal relation* or interinstitutional relation* or inter-institutional relation* or consultation liaison or algorithm* or treatment guideline* or treatment protocol* or treatment delivery or treatment model or adherence or compliance or concordance or patient care team or patient care management or patient care planning or case management or managed care program* or (healthcare N3 delivery) or (continuity N3 care) or professional-patient relations or interprofessional relations or inter-professional relations) ) OR ( AB (care manage* or chronic care* or complex intervention* or cooperative behav* or co-operative behav* or joint working or pathway or interprofessional or inter-professional or interdisciplinary or inter-disciplinary or multidisciplin* or multi-disciplin* or multiprofession* or multi-profession* or transdisciplin* or trans-disciplin* or multifacet* or multi-facet* or complex intervention* or multiple intervention* or multi-intervention* or organisational intervention* or organizational intervention* or interpersonal relation* or inter-personal relation* or interinstitutional relation* or inter-institutional relation* or consultation liaison or algorithm* or treatment guideline* or treatment protocol* or treatment delivery or treatment model or adherence or compliance or concordance or patient care team or patient care management or patient care planning or case management or managed care program* or (healthcare N3 delivery) or (continuity N3 care) or professional-patient relations or interprofessional relations or inter-professional relations) ) |
| S21 | TI "enhance* care*" or AB "enhance* care*" or TI "enhance* health*" or AB "enhance* health*" or TI "enhance* communicat*" or AB "enhance* communicat*"                                                                                                                                                                                                                                                                                                                                                                                                                                                                                                                                                                                                                                                                                                                                                                                                                                                                                                                                                                                                                                                                                                                                                                                                                                                                                                                                                                                                                                                                                                                                                                                                                                                                                                                                                                                                                                                                                                                                                                                                                                                               |
| S20 | TI "augment* care*" or AB "augment* care*" or TI "augment* health*" or AB "augment* health*" or TI "augment* communicat*" or AB "augment* communicat*"                                                                                                                                                                                                                                                                                                                                                                                                                                                                                                                                                                                                                                                                                                                                                                                                                                                                                                                                                                                                                                                                                                                                                                                                                                                                                                                                                                                                                                                                                                                                                                                                                                                                                                                                                                                                                                                                                                                                                                                                                                                               |
| S19 | TI "systematic care" or AB "systematic care" or TI "systematic health*" or AB "systematic health*" or TI "systematic work*" or AB "systematic work*" or TI "systematic interven*" or AB "systematic interven*" or TI "systematic service*" or AB "systematic service*" or TI "systematic model*" or AB "systematic model*" or TI "systematic effort*" or AB "systematic effort*" or TI "systematic manag*" or AB "systematic manag*"                                                                                                                                                                                                                                                                                                                                                                                                                                                                                                                                                                                                                                                                                                                                                                                                                                                                                                                                                                                                                                                                                                                                                                                                                                                                                                                                                                                                                                                                                                                                                                                                                                                                                                                                                                                 |
| S18 | TI "stepped care" or AB "stepped care" or TI "stepped health*" or AB "stepped health*" or TI "stepped work*" or AB "stepped work*" or TI "stepped interven*" or AB "stepped interven*" or TI "stepped service*" or AB "stepped service*" or TI "stepped model*" or AB "stepped model*" or TI "stepped effort*" or AB "stepped effort*" or TI "stepped manag*" or AB "stepped manag*"                                                                                                                                                                                                                                                                                                                                                                                                                                                                                                                                                                                                                                                                                                                                                                                                                                                                                                                                                                                                                                                                                                                                                                                                                                                                                                                                                                                                                                                                                                                                                                                                                                                                                                                                                                                                                                 |

|     |                                                                                                                                                                                                                                                                                                                                                                                                                                                   |
|-----|---------------------------------------------------------------------------------------------------------------------------------------------------------------------------------------------------------------------------------------------------------------------------------------------------------------------------------------------------------------------------------------------------------------------------------------------------|
| S17 | TI "integrat* care" or AB "integrat* care" or TI "integrat* health*" or AB "integrat* health*" or TI "integrat* work*" or AB "integrat* work*" or TI "integrat* interven*" or AB "integrat* interven*" or TI "integrat* service*" or AB "integrat* service*" or TI "integrat* model*" or AB "integrat* model*" or TI "inte-grat* effort*" or AB "inte-grat* effort*" or TI "integrat* manag*" or AB "integrat* manag*"                            |
| S16 | TI "shared care" or AB "shared care" or TI "shared health*" or AB "shared health*" or TI "shared work*" or AB "shared work*" or TI "shared interven*" or AB "shared interven*" or TI "shared service*" or AB "shared service*" or TI "shared model*" or AB "shared model*" or TI "shared effort*" or AB "shared effort*" or TI "shared manag*" or AB "shared manag*"                                                                              |
| S15 | TI "coordinat* care" or AB "coordinat* care" or TI "coordinat* health*" or AB "coordinat* health*" or TI "coordinat* work*" or AB "coordinat* work*" or TI "coordinat* interven*" or AB "coordinat* interven*" or TI "coordinat* service*" or AB "coordinat* service*" or TI "coordinat* model*" or AB "coordinat* model*" or TI "coordinat* effort*" or AB "coordinat* effort*" or TI "coordinat* manag*" or AB "coordinat* manag*"              |
| S14 | TI "collaborat* care" AB "collaborat* care" or TI "collaborat* health*" or AB "collaborat* health*" or TI "collaborat* work*" or AB "collaborat* work*" or TI "collaborat* interven*" or AB "collaborat* interven*" or TI "collaborat* service*" or AB "collaborat* service*" or TI "collaborat* model*" or AB "collaborat* model*" or TI "collaborat* effort*" or AB "collaborat* effort*" or TI "collaborat* manag*" or AB "collaborat* manag*" |
| S13 | MH "Case Mangement" OR MH Collaboration OR MH "Cooperative Behavior" OR MH "Interinstitutional Relations" OR MH "Interprofessional Relations" OR MH "Multidisciplinary Care Team" OR MH "Nurse-Physician Relations" OR MH "Patient Compliance" OR MH "Patient Centered Care" OR MH "Pharmacists/UT" OR MH Teamwork                                                                                                                                |
| S12 | S1 OR S2 OR S3 OR S4 OR S5 OR S6 OR S7 OR S8 OR S9 OR S10 OR S11                                                                                                                                                                                                                                                                                                                                                                                  |
| S11 | TI PTSD or AB PTSD or TI post-trauma* or AB post-trauma* or TI post trauma* or AB post-trauma* or TI postrauma* or AB postrauma* or TI posttrauma* or AB posttrauma*                                                                                                                                                                                                                                                                              |
| S10 | TI GAD OR AB GAD                                                                                                                                                                                                                                                                                                                                                                                                                                  |
| S9  | TI "social anxiety" or AB "social anxiety"                                                                                                                                                                                                                                                                                                                                                                                                        |
| S8  | AB claustrophobi* OR TI claustrophobi*                                                                                                                                                                                                                                                                                                                                                                                                            |
| S7  | AB agoraphobi* OR TI agoraphobi*                                                                                                                                                                                                                                                                                                                                                                                                                  |
| S6  | AB phobi*                                                                                                                                                                                                                                                                                                                                                                                                                                         |
| S5  | TI phobi*                                                                                                                                                                                                                                                                                                                                                                                                                                         |
| S4  | AB panic                                                                                                                                                                                                                                                                                                                                                                                                                                          |
| S3  | TI panic                                                                                                                                                                                                                                                                                                                                                                                                                                          |
| S2  | TI obsessi* AB obsessi* or TI compulsi* or AB compulsi*                                                                                                                                                                                                                                                                                                                                                                                           |
| S1  | MH "Depression+" OR MH "Anxiety Disorders" OR MH "Anxiety" OR MH "Obsessive-Compulsive Disorder" OR MH "Panic Disorder" OR MH "Phobic Disorders" OR MH "Agoraphobia" OR MH "Claustrophobia" OR MH "Social Anxiety Disorders" OR MH "Stress Disorders, Post-Traumatic" OR TI depression or AB depression or TI depressive or AB depressive or TI dysthymi* or AB dysthymi* OR TI anxiety or AB anxiety or TI anxious AB anxious                    |
